# Supplementary material for: Patched 1 reduces the accessibility of cholesterol in the outer leaflet of membranes
Source: eLife journal article supplement (doi:10.7554/elife.70504), 2021-10-26

PTCH1, PFOD4H and P38 blot showing cropping used in Figure 3- figure supplement 1 in dashed boxes. Two exposures were used in the figure with the darker exposure (right) used to shown PFOD4H. PFOD4H was detected by blotting for the TdTomato fusion protein. TdTomato-PFOD4H is expected to run at ~65 kDa.

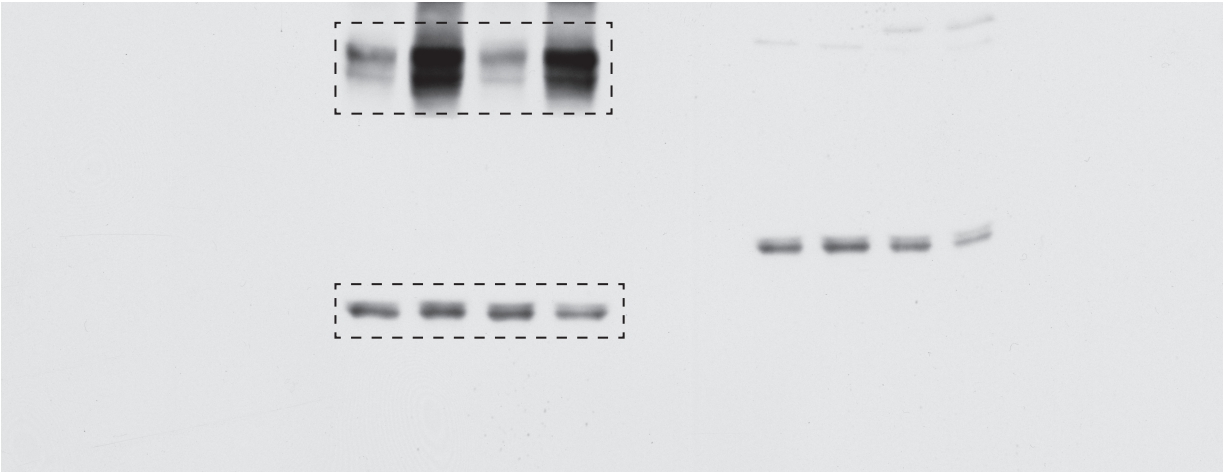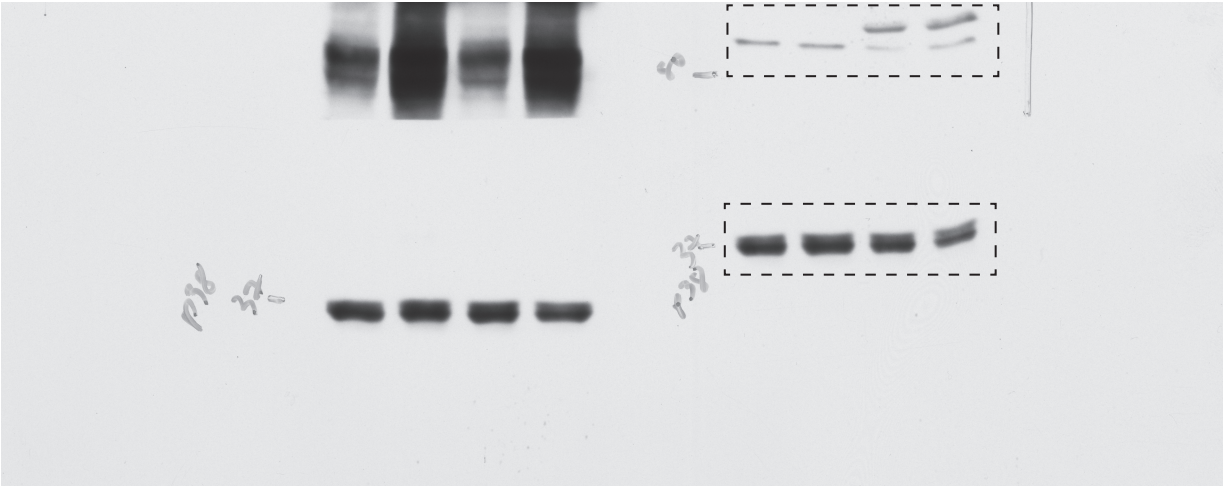

Supplement: fig3-figsupp1-data1 [file elife-70504-fig3-figsupp1-data1-v2.zip]
