# Supplementary material for: Patched 1 reduces the accessibility of cholesterol in the outer leaflet of membranes
Source: eLife journal article supplement (doi:10.7554/elife.70504), 2021-10-26
Supplement: fig5-data1 [file elife-70504-fig5-data1-v2.pdf]

Figure 4- Source Data 1

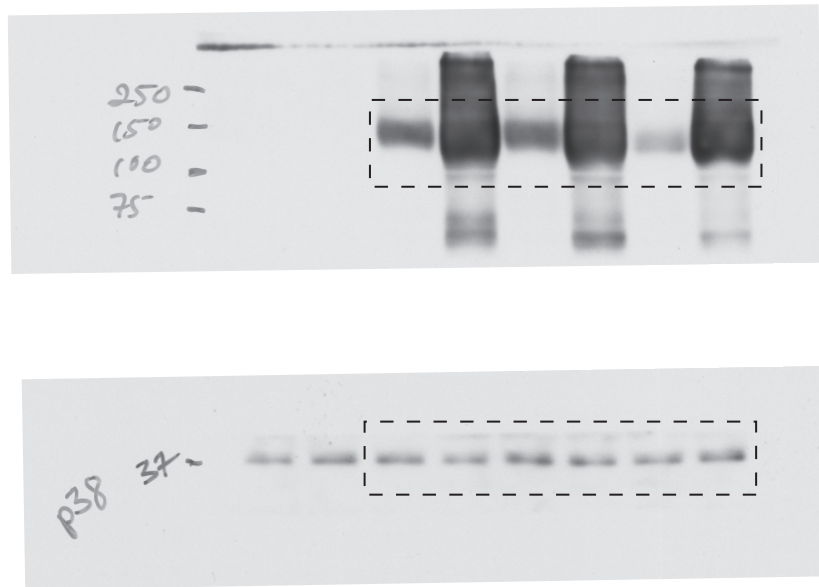

Figure 4--Source Data 1. Uncropped scans from immunoblots shown in Figure 4B. Dotted lines denote the cropped region of the immunoblot that is shown Figure 4B.
